# Supplementary material for: Syndiotactic Poly(4-methyl-1-pentene)-Based Stereoregular Diblock Copolymers: Synthesis and Self-Assembly Studies
Source: MDPI journal article supplement (doi:10.3390/polym14224815), 2022-11-09
Supplement: s1 [file s1]

# **Syndiotactic Poly(4-methyl-1-pentene)-based Stereoregular Diblock Copolymers: Synthesis and Self-assembly Studies**

**Yu-Chuan Sung <sup>1</sup>, Pei-Sun Huang <sup>1</sup>, Shih-Hung Huang <sup>2</sup>, Yeo-Wan Chiang <sup>2,\*</sup> and  
Jing-Cherng Tsai <sup>1,\*</sup>**

<sup>1</sup> Department of Chemical Engineering, National Chung Cheng University  
Chiayi 62142, Taiwan

<sup>2</sup> Department of Materials and Optoelectronic Science, National Sun Yat-Sen  
University, Kaohsiung 80424, Taiwan

\* Correspondence to: [chmjct@ccu.edu.tw](mailto:chmjct@ccu.edu.tw)

### **Supporting information**

|                    |                                                                             |    |
|--------------------|-----------------------------------------------------------------------------|----|
| <b>Figure S1.</b>  | $^{13}\text{C}$ -NMR and DEPT135 spectra of OH-capped sP4M1P.....           | 3  |
| <b>Figure S2.</b>  | $^1\text{H}$ - $^{13}\text{C}$ HMQC spectrum of OH-capped sP4M1P.....       | 4  |
| <b>Figure S3.</b>  | $^{13}\text{C}$ -NMR and DEPT135 spectra of sP4M1P-bromoester.....          | 5  |
| <b>Figure S4.</b>  | $^1\text{H}$ - $^{13}\text{C}$ HMQC spectrum of sP4M1P-bromoester.....      | 6  |
| <b>Figure S5.</b>  | $^{13}\text{C}$ -NMR and DEPT135 spectra of sP4M1P- <i>b</i> -PMMA.....     | 7  |
| <b>Figure S6.</b>  | $^1\text{H}$ - $^{13}\text{C}$ HMQC spectrum of sP4M1P- <i>b</i> -PMMA..... | 8  |
| <b>Figure S7.</b>  | $^{13}\text{C}$ -NMR and DEPT135 spectra of sP4M1P- <i>b</i> -aPS.....      | 9  |
| <b>Figure S8.</b>  | $^1\text{H}$ - $^{13}\text{C}$ HMQC spectrum of sP4M1P- <i>b</i> -aPS.....  | 10 |
| <b>Figure S9.</b>  | DSC heating thermograms of sP4M1P- <i>b</i> -PMMA.....                      | 11 |
| <b>Figure S10.</b> | DSC heating thermograms of sP4M1P- <i>b</i> -aPS.....                       | 12 |

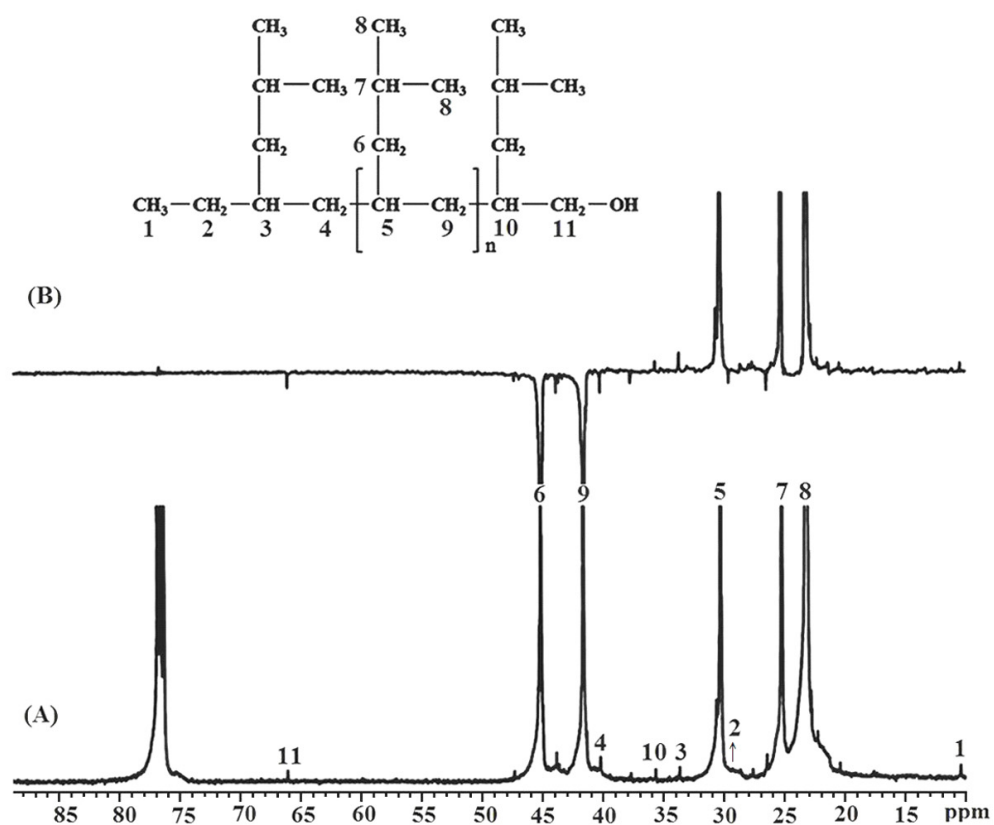

**Figure S1.**  $^{13}\text{C}$  and  $^{13}\text{C}$  (DEPT135) NMR spectra (125 MHz) of OH-capped sP4M1P ( $M_n=9890$  g/mol,  $M_w/M_n=1.65$ ) (solvent:  $\text{CDCl}_3$ ; temperature:  $60^\circ\text{C}$ ).

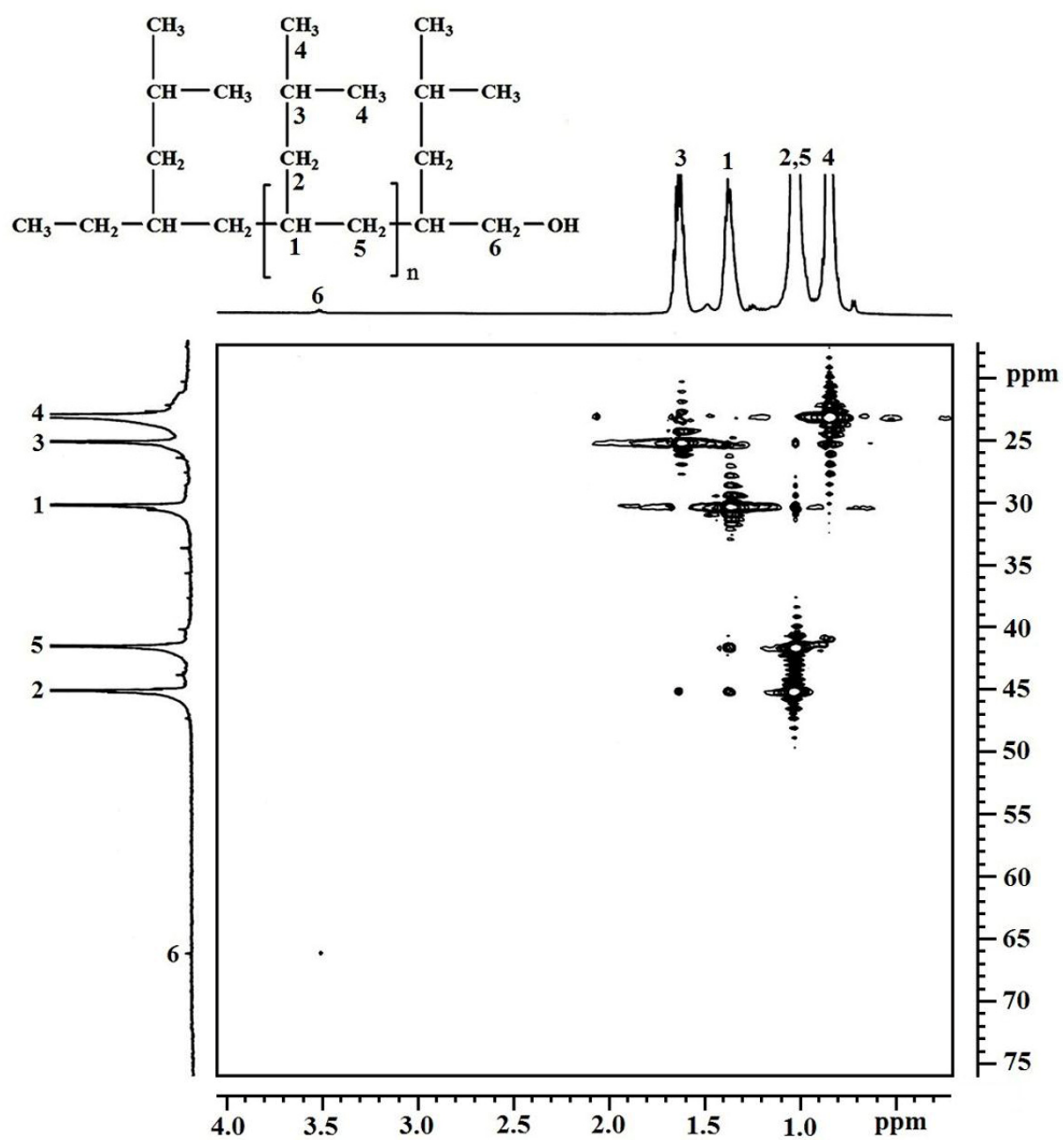

**Figure S2.**  $^1\text{H}$ - $^{13}\text{C}$  HMQC spectrum of OH-capped sP4M1P ( $M_n$ =9890 g/mol,  $M_w/M_n$ =1.65) (solvent:  $\text{CDCl}_3$ ; temperature:  $60^\circ\text{C}$ ).

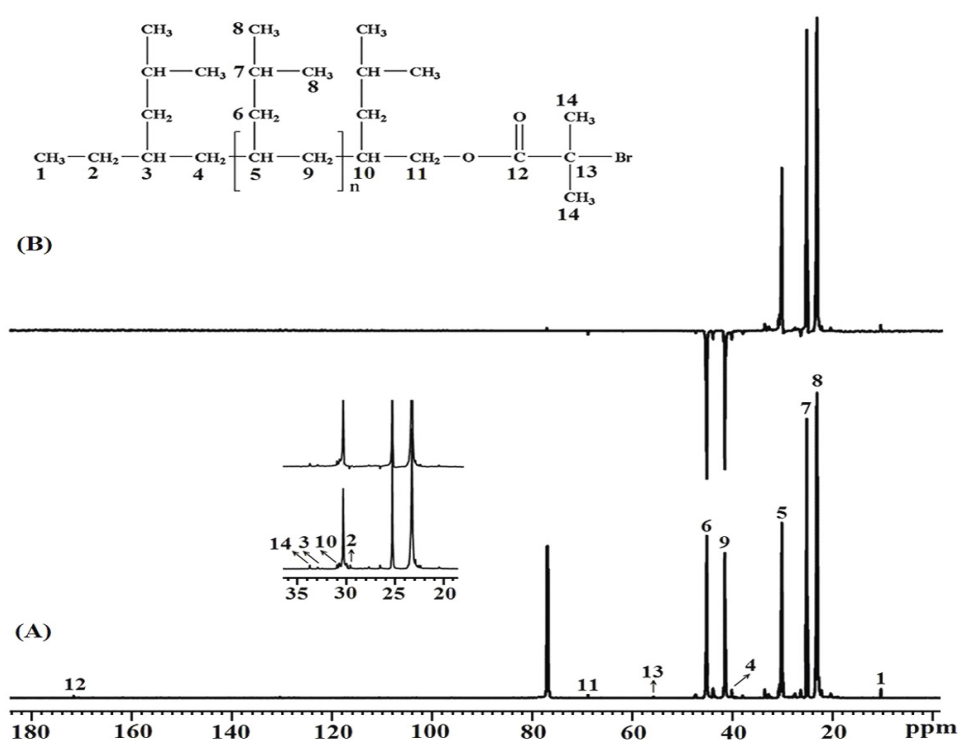

**Figure S3.**  $^{13}\text{C}$  and  $^{13}\text{C}$  (DEPT135) NMR spectra (125 MHz) of sP4M1P-bromoester ( $M_n = 10500$  g/mol,  $M_w/M_n = 1.39$ ) (solvent:  $\text{CDCl}_3$ ; temperature:  $60^\circ\text{C}$ ).

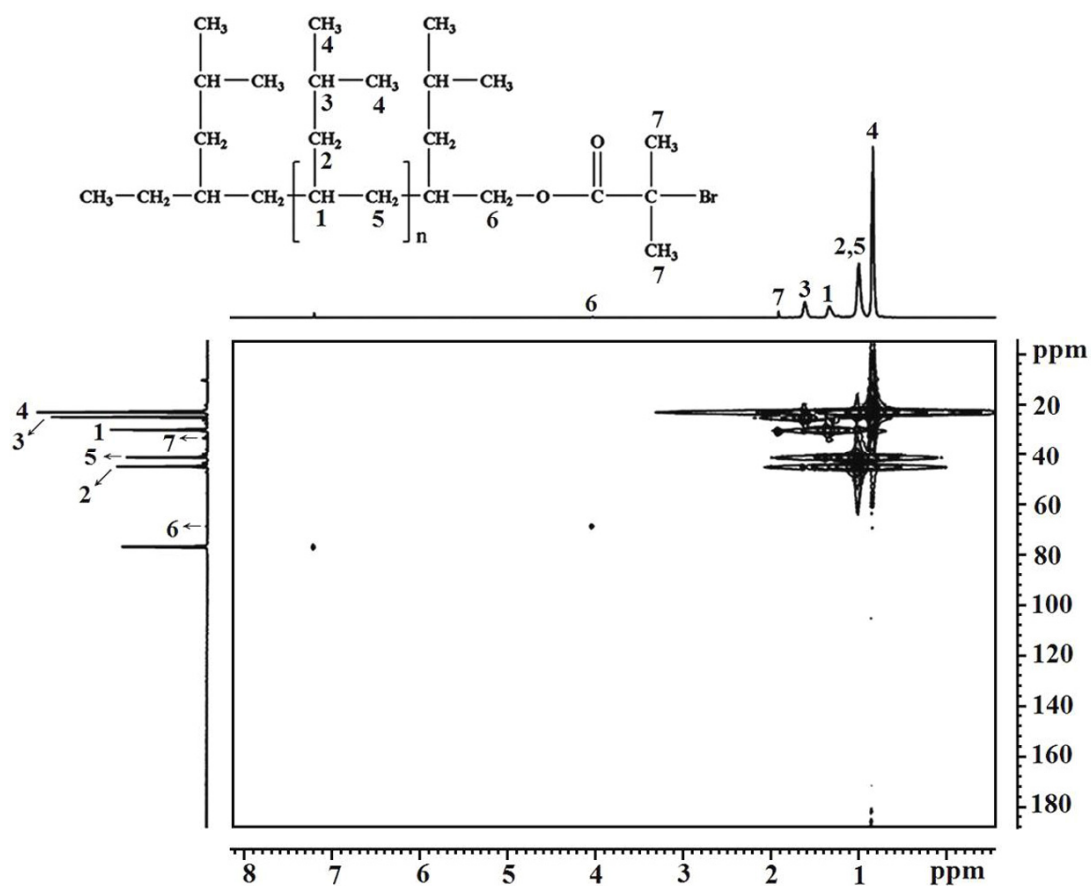

**Figure S4.**  $^1\text{H}$ - $^{13}\text{C}$  HMQC spectrum of sP4M1P-bromoester ( $M_n = 10500$  g/mol,  $M_w/M_n = 1.39$ ) (solvent:  $\text{CDCl}_3$ ; temperature:  $60^\circ\text{C}$ ).

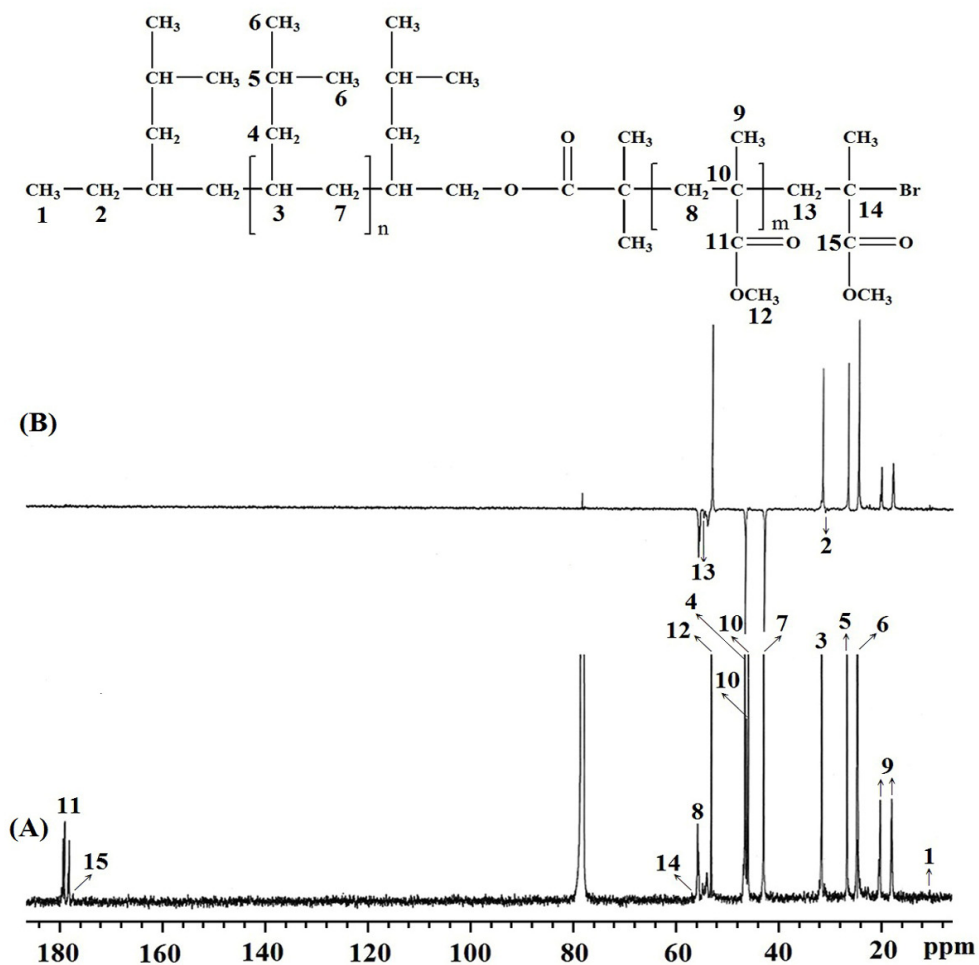

**Figure S5.**  $^{13}\text{C}$  and  $^{13}\text{C}$  (DEPT135) NMR spectra (125 MHz) of sP4M1P-*b*-PMMA (solvent:  $\text{CDCl}_3$ ; temperature:  $60^\circ\text{C}$ ).

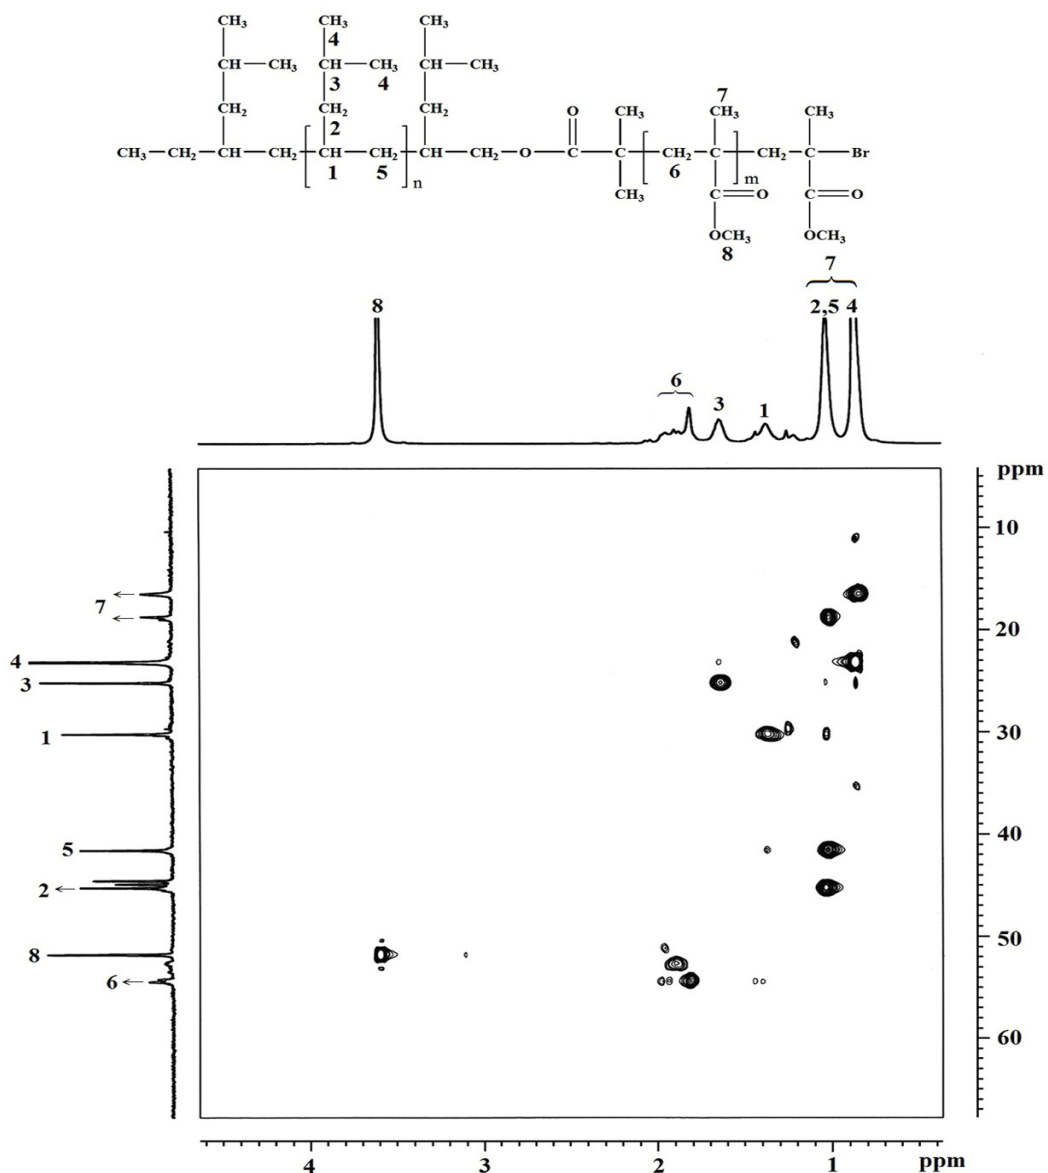

**Figure S6.** <sup>1</sup>H-<sup>13</sup>C HMQC spectra of sP4M1P-*b*-PMMA (solvent: CDCl<sub>3</sub>; temperature: 60°C).



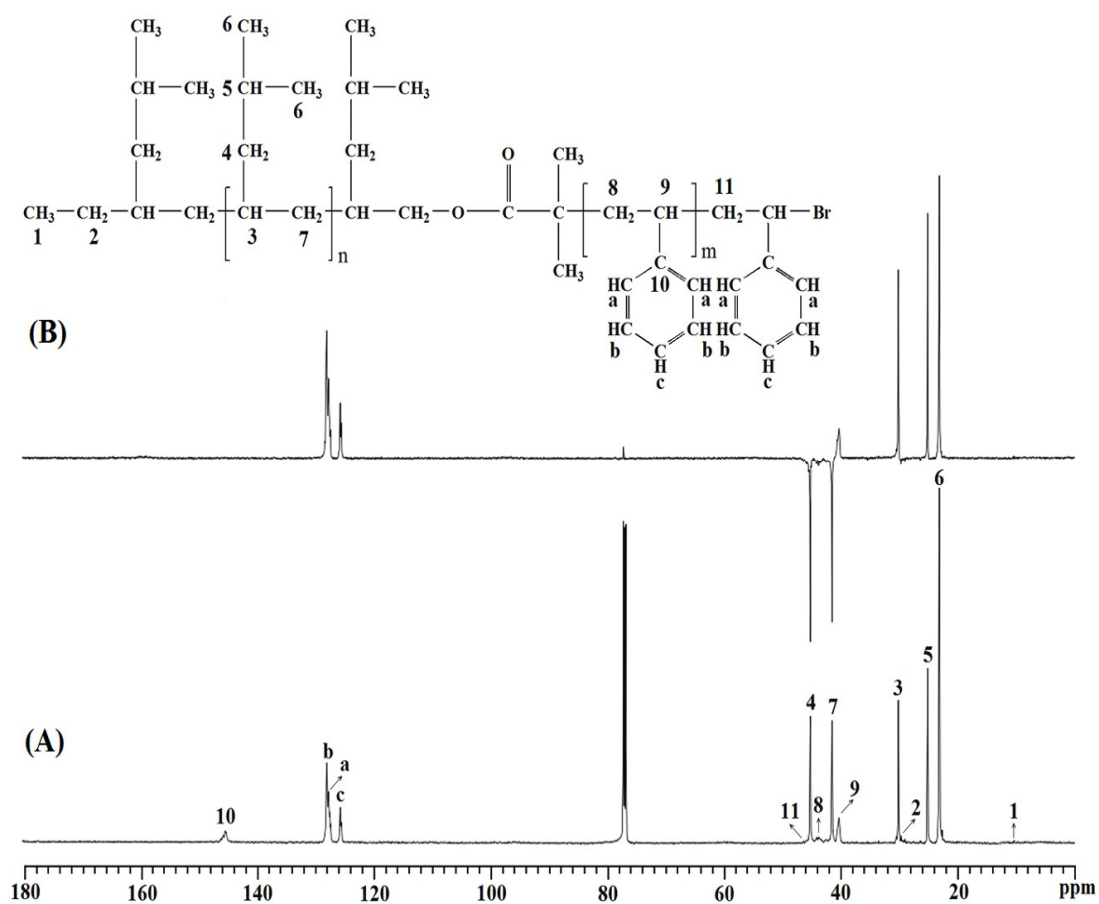

**Figure S7.**  $^{13}\text{C}$  and  $^{13}\text{C}$  (DEPT135) NMR spectra (125 MHz) of  $sP4M1P\text{-}b\text{-}aPS$  (solvent:  $\text{CDCl}_3$ ; temperature:  $60^\circ\text{C}$ ).

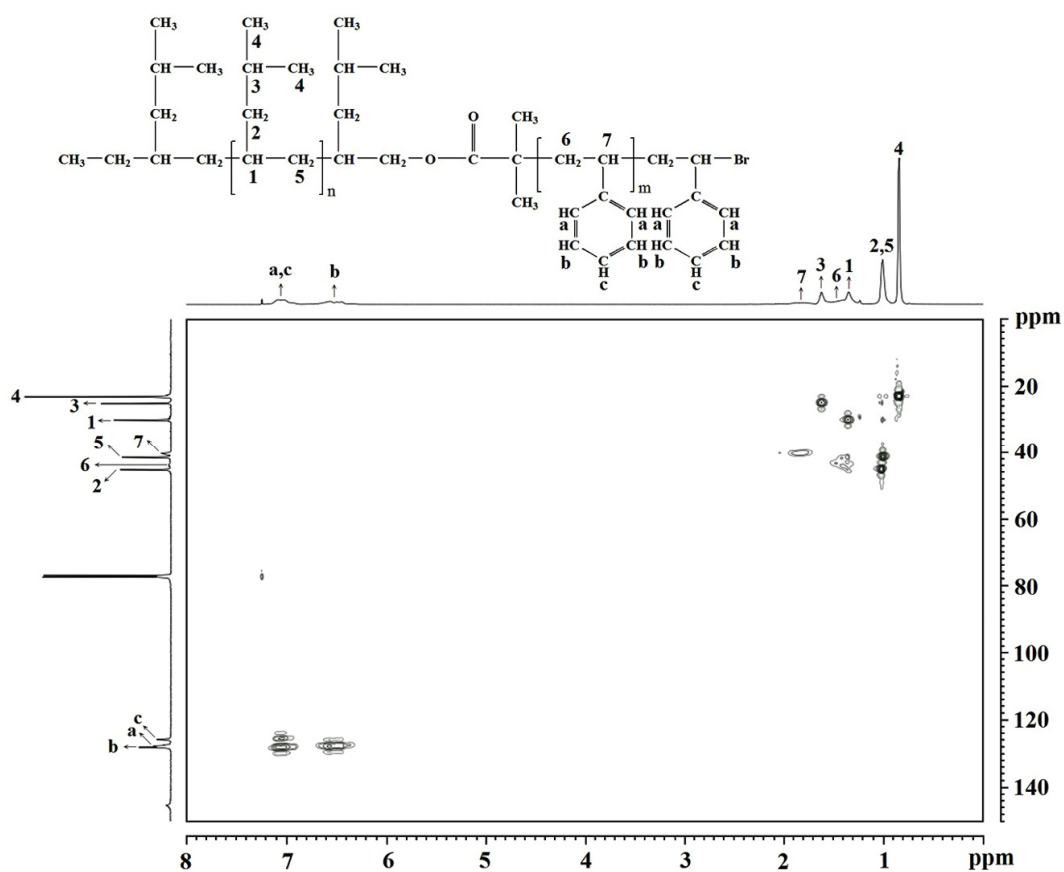

**Figure S8.**  $^1\text{H}$ - $^{13}\text{C}$  HMQC spectrum of sP4M1P-*b*-aPS (solvent:  $\text{CDCl}_3$ ; temperature:  $60^\circ\text{C}$ ).

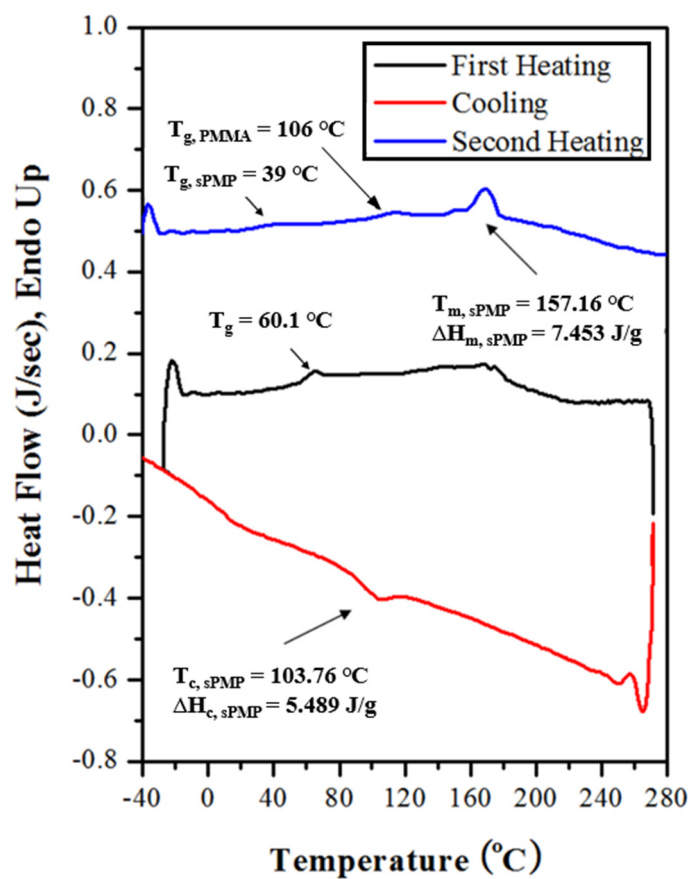

**Figure S9.** DSC heating thermograms of sP4M1P-*b*-PMMA.

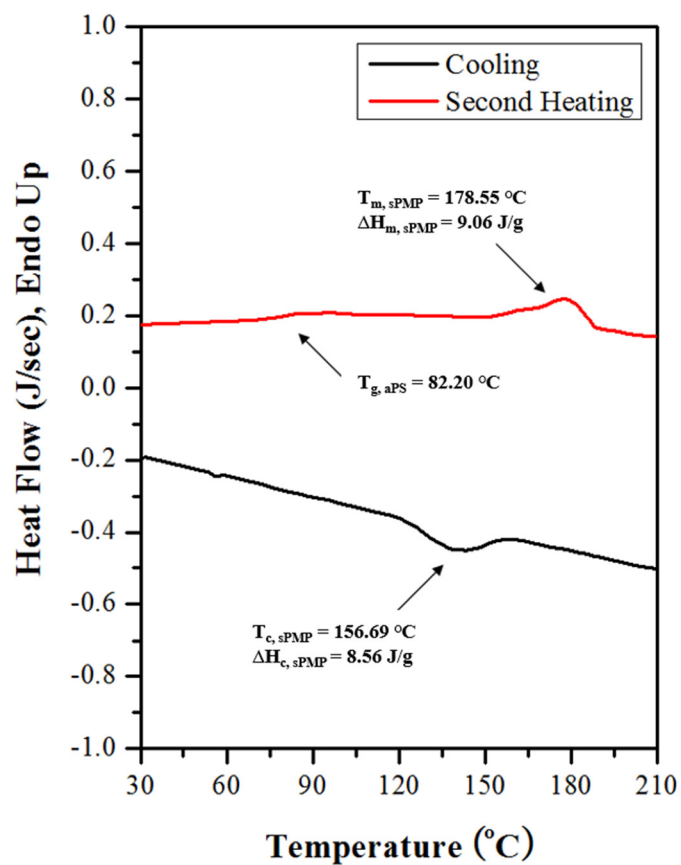

**Figure S10.** DSC heating thermograms of sP4M1P-*b*-aPS.
